# Supplementary material for: Next generation histology methods for three-dimensional imaging of fresh and archival human brain tissues
Source: PubMed Central journal article supplement (PMC5852003; doi:10.1038/s41467-018-03359-w), 2018-03-14
Supplement: 41467_2018_3359_MOESM2_ESM.pdf [file 41467_2018_3359_MOESM2_ESM.pdf]

## **Descriptions of Additional Supplementary Files**

File Name: Supplementary Movie 1

Description: Demonstration of the application of next generation histology protocols for three-dimensional visualization of human neural tissue architecture.
